# Supplementary material for: Cell-specific gain modulation by synaptically released zinc in cortical circuits of audition
Source: eLife journal article supplement (doi:10.7554/elife.29893), 2017-09-09
Supplement: supp [file elife-29893-supp-v1.zip]

Archive with 4 entries (4 files):
- elife_poa_e29893_Transparent_Reporting_File.pdf
- elife_poa_e29893_Figure_2_figure_supplement_1.pdf
- elife_poa_e29893_Figure_1_figure_supplement_1.pdf
- elife_poa_e29893_Figure_3_figure_supplement_1.pdf
