# Supplementary figures and images for: Cell-specific gain modulation by synaptically released zinc in cortical circuits of audition
Source: eLife journal article supplement (doi:10.7554/elife.29893), 2017-09-09

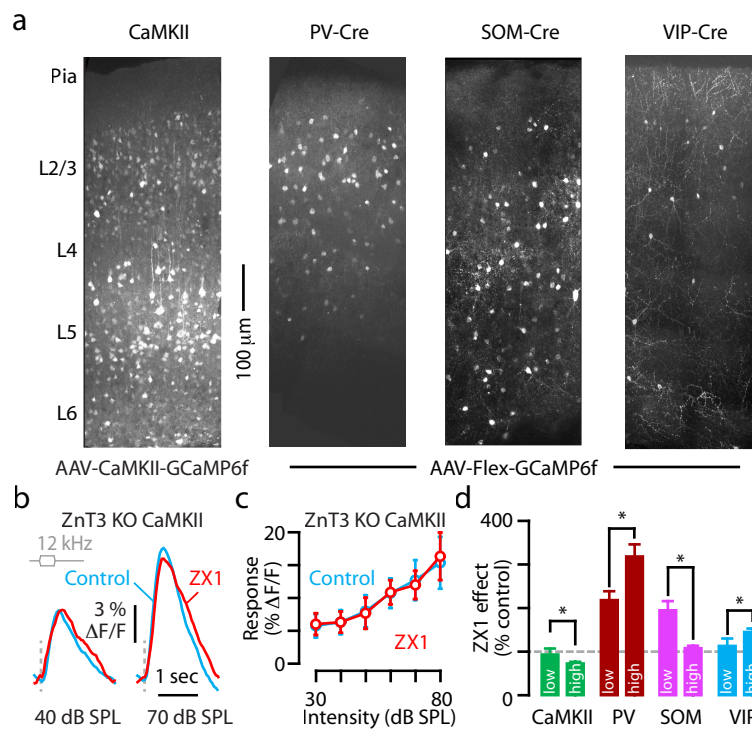

Figure 2 – figure supplement 1

Supplement: supp [file elife-29893-supp-v1.zip › elife_poa_e29893_Figure_2_figure_supplement_1.pdf]

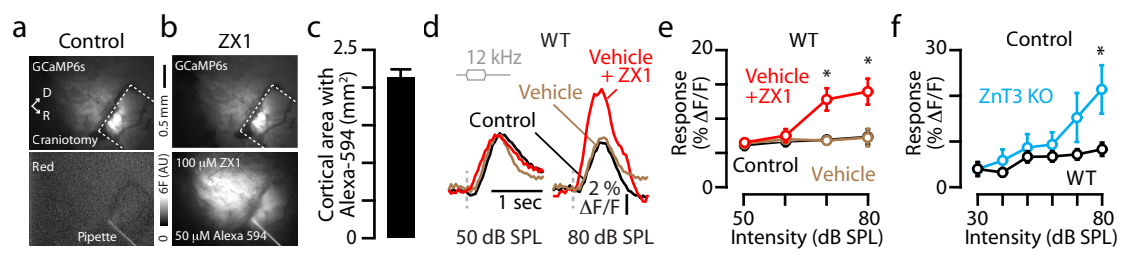

Figure 1 – figure supplement 1

Supplement: supp [file elife-29893-supp-v1.zip › elife_poa_e29893_Figure_1_figure_supplement_1.pdf]

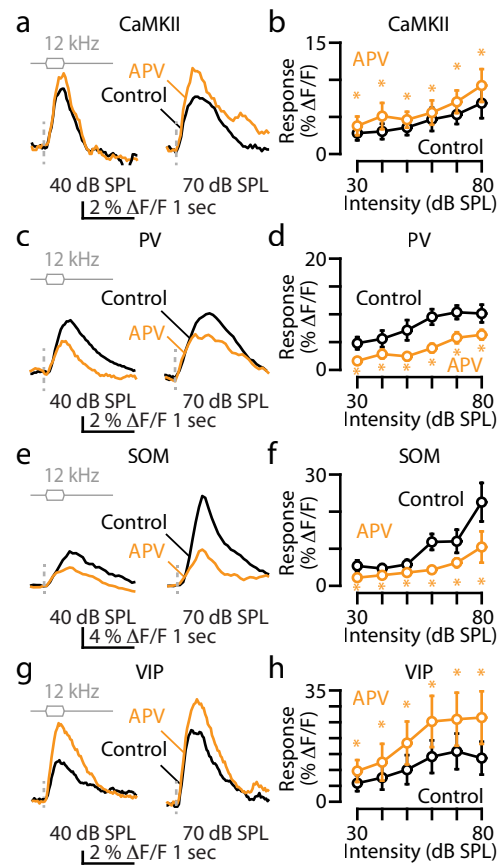

Figure 3 – Figure supplement 1

Supplement: supp [file elife-29893-supp-v1.zip › elife_poa_e29893_Figure_3_figure_supplement_1.pdf]
